# Supplementary material for: Population-based rates, risk factors and consequences of preterm births in South-Asia and sub-Saharan Africa: A multi-country prospective cohort study
Source: PubMed Central journal article supplement (PMC8850944; doi:10.7189/jogh.12.04011), 2022-02-19
Supplement: jogh-12-04011-s001.pdf [file jogh-12-04011-s001.pdf]

**Table S1. Risk factors associated with preterm births**

|                                                           | Non-preterm<br>(≥ 37 wks)<br>n=8993 | Preterm<br>(<37 wks)<br>n=981 | OR*<br>(95% CI)   | Adjusted OR<br>(95% CI) |
|-----------------------------------------------------------|-------------------------------------|-------------------------------|-------------------|-------------------------|
| <b>Maternal and household characteristics<sup>‡</sup></b> |                                     |                               |                   |                         |
| <b>Pregnant woman's age</b>                               |                                     |                               |                   |                         |
| 15-19 years                                               | 1043 (89.3)                         | 125 (10.7)                    | 1.19 (0.97, 1.48) | 1.27 (1.03, 1.58)       |
| 20-34                                                     | 6041 (90.6)                         | 624 (9.4)                     | 1.0 (reference)   | 1.0 (reference)         |
| 35+                                                       | 945 (92.8)                          | 74 (7.3)                      | 0.96 (0.74, 1.24) | 0.89 (0.69, 1.17)       |
| <b>Pregnant woman's education</b>                         |                                     |                               |                   |                         |
| No education                                              | 1877 (87.6)                         | 265 (12.4)                    | 1.0 (reference)   | 1.0 (reference)         |
| 1-6 years                                                 | 2818 (91.2)                         | 273 (8.8)                     | 0.97 (0.70, 1.19) | 1.02 (0.81, 1.27)       |
| 7-12 years                                                | 3724 (91.5)                         | 345 (8.5)                     | 0.86 (0.71, 1.06) | 0.99 (0.79, 1.25)       |
| 13+ years                                                 | 99 (94.3)                           | 6 (5.7)                       | 0.63 (0.27,1.47)  | 0.97 (0.42, 2.32)       |
| <b>Wealth quintile</b>                                    |                                     |                               |                   |                         |
| Poorest                                                   | 1617 (89.6%)                        | 187 (10.4%)                   | 1.39 (1.10, 1.73) | 1.36 (1.05, 1.77)       |
| Poorer                                                    | 1661 (89.6%)                        | 193 (10.4%)                   | 1.39 (1.10, 1.74) | 1.36 (1.06, 1.75)       |
| Middle                                                    | 1645 (89.8%)                        | 186 (10.2%)                   | 1.33 (1.06, 1.67) | 1.28 (1.00, 1.64)       |
| Richer                                                    | 1649 (90.8%)                        | 168 (9.3%)                    | 1.19 (0.94, 1.50) | 1.16 (0.92, 1.49)       |
| Richest                                                   | 1702 (92.1%)                        | 146 (7.9%)                    | 1.0 (reference)   | 1.0 (reference)         |
| <b>Previous obstetric history<sup>β</sup></b>             |                                     |                               |                   |                         |
| <b>Previous stillbirth</b>                                |                                     |                               |                   |                         |
| No                                                        | 6065 (91)                           | 597 (9)                       | 1.0 (reference)   | 1.0 (reference)         |
| Yes                                                       | 581 (84.5)                          | 107 (15.6)                    | 1.87 (1.49, 2.35) | 1.84 (1.42, 2.37)       |
| <b>Previous preterm birth</b>                             |                                     |                               |                   |                         |
| No                                                        | 6443 (90.5)                         | 674 (9.5)                     | 1.0 (reference)   | 1.0 (reference)         |
| Yes                                                       | 125 (82.8)                          | 26 (17.2)                     | 1.93 (1.24, 3.00) | 1.96 (1.18, 3.26)       |
| <b>Morbidity during current pregnancy<sup>€</sup></b>     |                                     |                               |                   |                         |
| <b>Antepartum haemorrhage</b>                             |                                     |                               |                   |                         |
| No                                                        | 7496 (91.0)                         | 743 (9.0)                     | 1.0 (reference)   | 1.0 (reference)         |
| Yes                                                       | 113 (87.6)                          | 16 (12.4)                     | 1.23 (0.72, 2.13) | 1.24 (0.66, 2.33)       |
| <b>Pre-eclampsia or eclampsia</b>                         |                                     |                               |                   |                         |
| No                                                        | 7475 (91.0)                         | 739 (9.0)                     | 1.0 (reference)   | 1.0 (reference)         |
| Yes                                                       | 127 (87.0)                          | 19 (13.01)                    | 2.36 (1.42, 3.91) | 2.74 (1.56, 4.84)       |
| <b>Fever before or during delivery</b>                    |                                     |                               |                   |                         |
| No                                                        | 6504 (91.7)                         | 587 (8.3)                     | 1.0 (reference)   | 1.0 (reference)         |
| Yes                                                       | 225 (83)                            | 46 (17)                       | 1.65 (1.12, 2.24) | 1.76 (1.18, 2.62)       |
| <b>Multiple birth</b>                                     |                                     |                               |                   |                         |
| Singleton                                                 | 8861 (91.1)                         | 867 (8.9)                     | 1.0 (reference)   | 1.0 (reference)         |
| Multiple birth                                            | 132 (53.7)                          | 114 (46.3)                    | 13.3 (10.0, 17.8) | 14.3 (9.92, 20.52)      |

\* The estimate was adjusted for site.

β The estimates were adjusted for the other factors on previous obstetric history, maternal age, maternal education, wealth quintile, and site.

€ Each maternal morbidity-outcome was analyzed in a separate logistic regression model. Each model was adjusted for maternal age, maternal education, wealth quintile, previous obstetric history and site.

**Table S2. Risk factors associated with spontaneous preterm birth**

|                                                           | Non-preterm<br>(≥ 37 wks)<br>n=7863 | Preterm<br>(<37 wks)<br>n=761 | OR*<br>(95% CI)     | Adjusted OR<br>(95% CI) |
|-----------------------------------------------------------|-------------------------------------|-------------------------------|---------------------|-------------------------|
| <b>Maternal and household characteristics<sup>‡</sup></b> |                                     |                               |                     |                         |
| <b>1. Pregnant woman's age</b>                            |                                     |                               |                     |                         |
| 15-19 years                                               | 916 (89.5)                          | 107 (10.5)                    | 1.33 (1.06, 1.67)   | 1.41 (1.12, 1.78)       |
| 20-34                                                     | 5369 (91.6)                         | 490 (8.4)                     | 1.0 (reference)     | 1.0 (reference)         |
| 35+                                                       | 858 (93.3)                          | 62 (6.7)                      | 1.01 (0.76, 1.34)   | 0.94 (0.70, 1.26)       |
| <b>2. Pregnant woman's education</b>                      |                                     |                               |                     |                         |
| No education                                              | 1729 (88.7)                         | 220 (11.3)                    | 1.0 (reference)     | 1.0 (reference)         |
| 1-6 years                                                 | 2537 (91.8)                         | 228 (8.3)                     | 0.95 (0.75, 1.19)   | 1.02(0.80, 1.30)        |
| 7-12 years                                                | 3211 (92.7)                         | 254 (7.3)                     | 0.81 (0.65, 1.02)   | 0.98(0.75, 1.26)        |
| 13+ years                                                 | 74 (93.7)                           | 5 (6.3)                       | 0.81 (0.32,2.05)    | 1.39(0.53, 3.62)        |
| <b>3. Wealth quintile</b>                                 |                                     |                               |                     |                         |
| Poorest                                                   | 1519 (90.3%)                        | 164 (9.7%)                    | 1.55 (1.19, 2.03)   | 1.52(1.13, 2.04)        |
| Poorer                                                    | 1529 (90.1%)                        | 168 (9.9%)                    | 1.59 (1.22, 2.07)   | 1.55(1.16, 2.06)        |
| Middle                                                    | 1468 (90.8%)                        | 149 (9.2%)                    | 1.46 (1.11, 1.91)   | 1.39(1.04, 1.85)        |
| Richer                                                    | 1402 (91.9%)                        | 124 (8.1%)                    | 1.27 (0.96, 1.68)   | 1.26(0.95, 1.69)        |
| Richest                                                   | 1376 (93.6%)                        | 94 (6.4%)                     | 1.0 (reference)     | 1.0 (reference)         |
| <b>Previous obstetric history<sup>β</sup></b>             |                                     |                               |                     |                         |
| <b>1. Previous stillbirth</b>                             |                                     |                               |                     |                         |
| No                                                        | 5497 (91.9)                         | 483 (8.1)                     | 1.0 (reference)     | 1.0 (reference)         |
| Yes                                                       | 506 (86.1)                          | 82 (14.0)                     | 1.81 (1.40, 2.34)   | 1.73(1.30, 2.30)        |
| <b>2. Previous preterm birth</b>                          |                                     |                               |                     |                         |
| No                                                        | 5824 (91.5)                         | 541 (8.5)                     | 1.0 (reference)     | 1.0 (reference)         |
| Yes                                                       | 108 (84.4)                          | 20 (15.6)                     | 2.00 (1.22, 3.28)   | 2.00(1.12, 3.55)        |
| <b>Morbidity during current pregnancy<sup>ε</sup></b>     |                                     |                               |                     |                         |
| <b>1. Antepartum haemorrhage</b>                          |                                     |                               |                     |                         |
| No                                                        | 6692 (91.7)                         | 603 (8.3)                     | 1.0 (reference)     | 1.0 (reference)         |
| Yes                                                       | 101 (87.8)                          | 14 (12.2)                     | 1.35 (0.75, 2.40)   | 1.42(0.73, 2.76)        |
| <b>2. Pre-eclampsia or eclampsia</b>                      |                                     |                               |                     |                         |
| No                                                        | 6674 (91.7)                         | 605 (8.3)                     | 1.0 (reference)     | 1.0 (reference)         |
| Yes                                                       | 112 (89.6)                          | 13 (10.4)                     | 1.91 (1.05, 3.48)   | 2.38(1.25, 4.52)        |
| <b>3. Fever before or during delivery</b>                 |                                     |                               |                     |                         |
| No                                                        | 5956 (92.3)                         | 498 (7.7)                     | 1.0 (reference)     | 1.0 (reference)         |
| Yes                                                       | 200 (83.0)                          | 41 (17.0)                     | 1.90 (1.31, 2.75)   | 2.11(1.39, 3.20)        |
| <b>4. Multiple birth</b>                                  |                                     |                               |                     |                         |
| Singleton                                                 | 7757 (91.9)                         | 681 (8.1)                     | 1.0 (reference)     | 1.0 (reference)         |
| Multiple birth                                            | 106 (57.0)                          | 80 (43.0)                     | 12.38 (8.92, 17.19) | 13.42(9.03, 19.95)      |

\* The estimate was adjusted for site.

‡ The estimates were adjusted for all other maternal and household characteristics and site.

β The estimates were adjusted for the other factors on previous obstetric history, six maternal and household characteristics, and site.

€ Each maternal morbidity-outcome was analyzed in a separate logistic regression model. Each model was adjusted for maternal and household characteristics, previous obstetric history and site.
